# Supplementary material for: A Facile Method for the Removal of dsRNA Contaminant from In Vitro-Transcribed mRNA
Source: PubMed Central journal article supplement (PMC6444222; doi:10.1016/j.omtn.2019.02.018), 2019-02-27
Supplement: mmc1.pdf [file mmc1.pdf]

OMTN, Volume 15

## Supplemental Information

### **A Facile Method for the Removal of dsRNA Contaminant from *In Vitro*-Transcribed mRNA**

**Markus Baiersdörfer, Gábor Boros, Hiromi Muramatsu, Azita Mahiny, Irena Vlatkovic, Ugur Sahin, and Katalin Karikó**

Supplementary Fig. 1

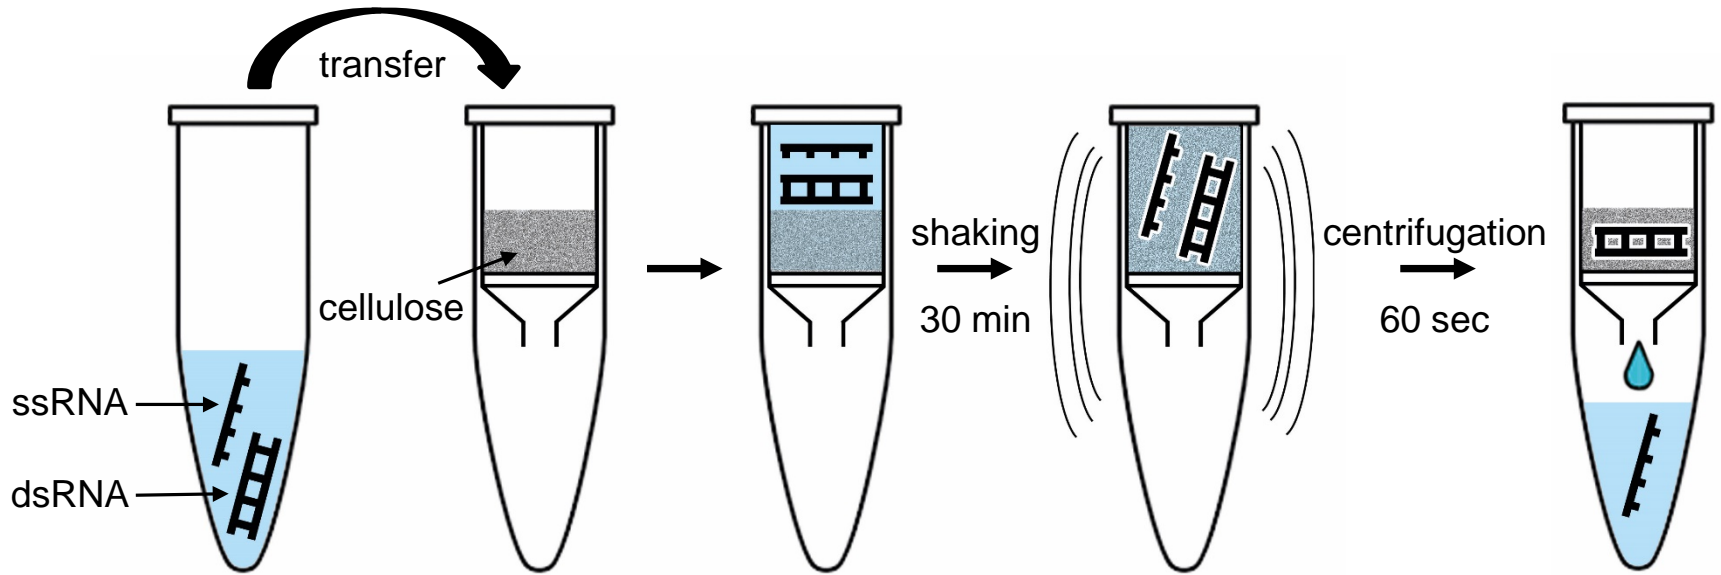

Supplementary Fig. 2

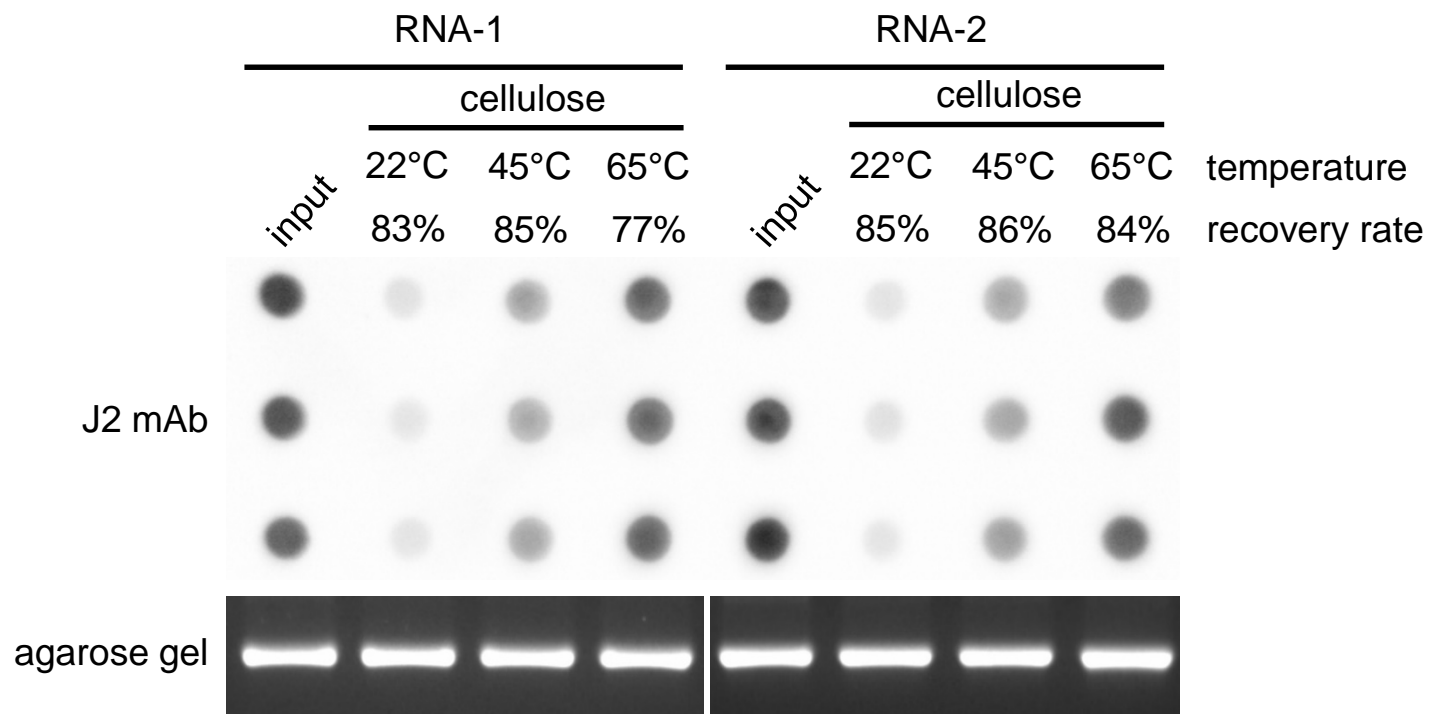

1 **SUPPLEMENTARY MATERIALS**

2 **Supplementary Figure 1. Schematic overview of the cellulose-based purification**  
3 **method using microcentrifuge spin column.** IVT mRNA in chromatography buffer  
4 containing 16% (v/v) ethanol is transferred to cellulose-loaded microcentrifuge spin  
5 column. The spin column is shaken vigorously at room temperature for 30 minutes to  
6 promote resuspension of the cellulose and its association with the dsRNA contaminant  
7 contained in the IVT mRNA. By centrifugation of the spin column at 14,000 x g for 60  
8 seconds the cellulose together with the associated dsRNA contaminant is separated from  
9 the unbound single-stranded IVT mRNA (ssRNA) in the flow through.

10 **Supplementary Figure 2. High temperatures decrease the efficiency of dsRNA removal**  
11 **with cellulose chromatography.** Two different uridine-containing, 1.9 kb-long IVT mRNAs  
12 (RNA-1 and RNA-2) were purified at 22°C, 45°C or 65°C using cellulose-filled  
13 microcentrifuge spin columns. Aliquots of the unpurified (input) and cellulose-purified IVT  
14 mRNAs (1 µg per dot) were analyzed in triplicates on dot blot with J2 dsRNA-specific mAb  
15 for presence of dsRNA contaminants. The recovery rates of the purified mRNAs relative  
16 to the input mRNA are noted. The integrities of unpurified and cellulose-purified IVT  
17 mRNAs were analyzed by electrophoresis on a 1.4% agarose gel. The GelRed-stained RNAs  
18 were visualized by UV illumination.
